# Supplementary material for: Divergence between Neuronal and Oligodendroglial Cell Fate, in Postnatal Brain Neural Stem Cells, Leads to Divergent Properties in Polymorphic In Vitro Assays
Source: MDPI journal article supplement (doi:10.3390/cells11111743), 2022-05-25
Supplement: s1 [file s1]

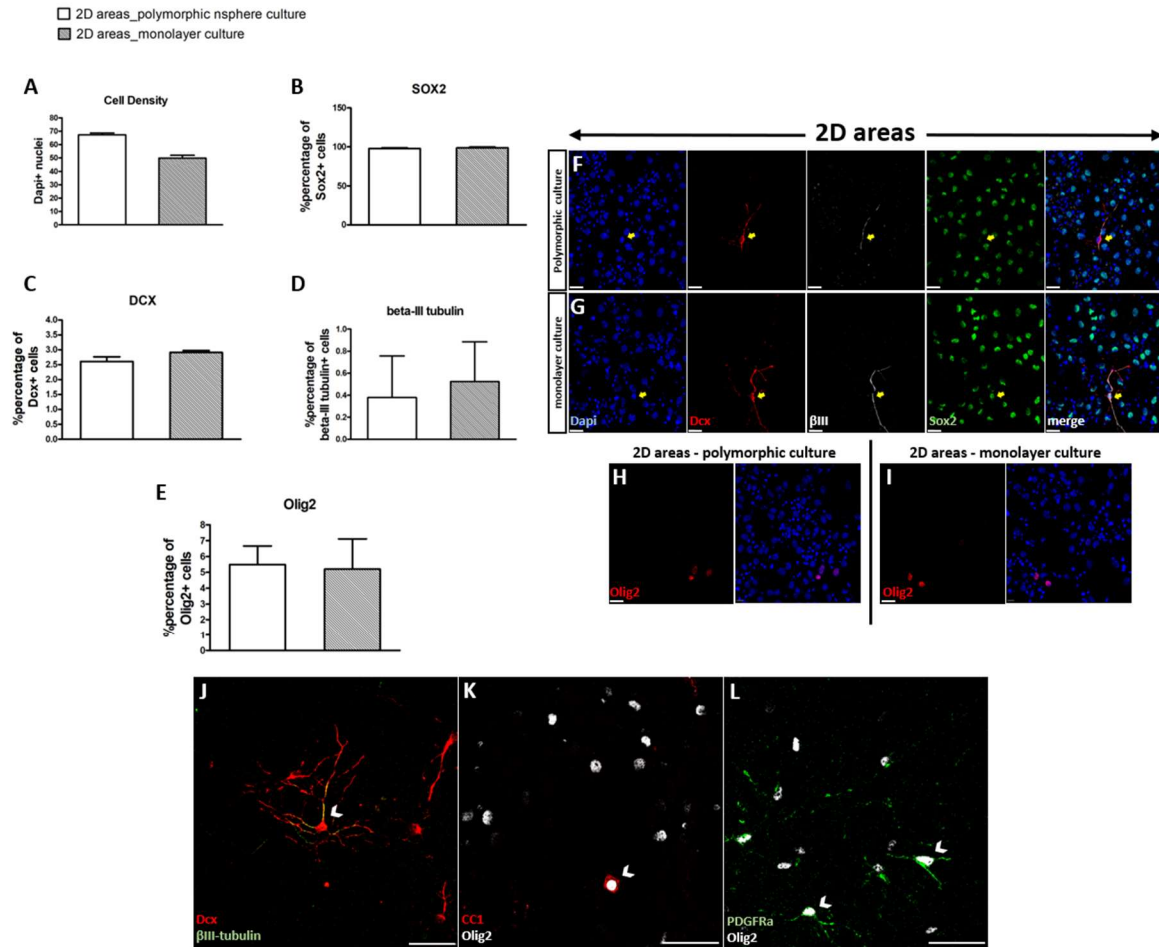

Figure S1. Validation of the cell profile between 2D areas of the polymorphic NSC assay and those of typical, adherent monolayer NSC cultures. (A-E) Graphs showing the comparison of total cell density (A) and of the percentages of Sox2+ (B), Dcx+ (C), beta-III tubulin+ (D) and Olig2+ (E) cells between 2D areas in the polymorphic NSC assay and the typical NSC monolayers after 7d of differentiation ( $p > 0.05$ , using paired t-test; Error bars: SEM;  $n = 2$  samples). (F-I) Representative images of 2D areas in the polymorphic assay (F, H) and in monolayer cultures (G, I) after immunostaining for the above-mentioned markers. The arrows indicate cells of neuronal cell fate (Dcx + BIII+ cells). (J-L) Representative images from polymorphic NSC assays after immunostaining for Dcx and  $\beta$ III (in J), Olig2 and CC1 (in K) and Olig2 and PDGFRa (in L). The arrowheads indicate a mature neuron (Dcx + BIII+, in J), a mature oligodendrocyte (Olig2 + CC1+, in K) and OPCs (Olig2 + PDGFRa+, in L). [Scale bars, F-I: 10  $\mu$ m and J- L: 40 $\mu$ m].

### A Oligodendroglial lineage cells around Olig2+ cell

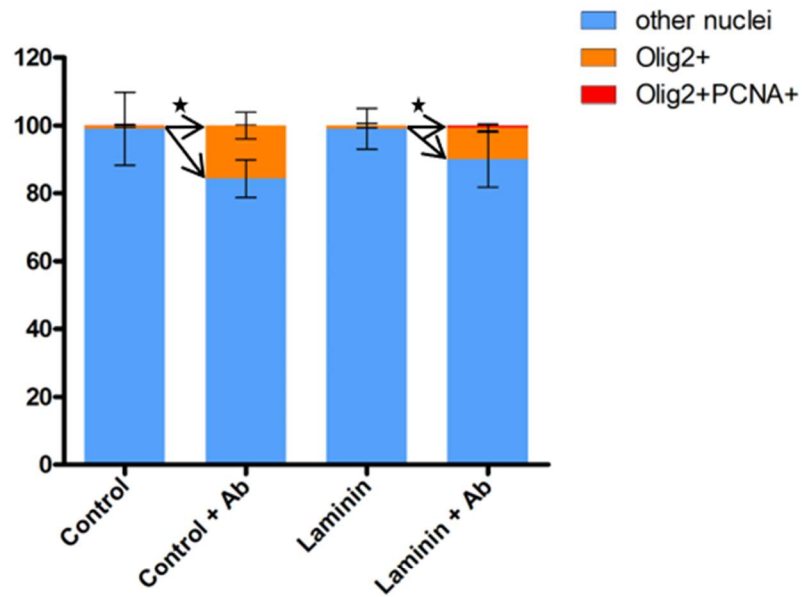

### B Number of processes

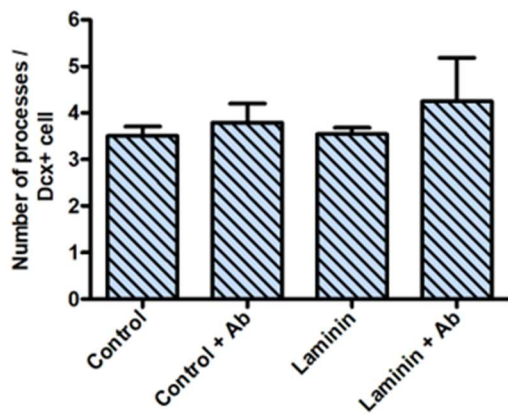

### C Total length of processes

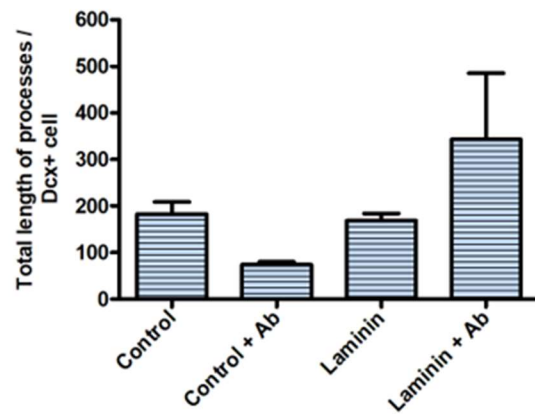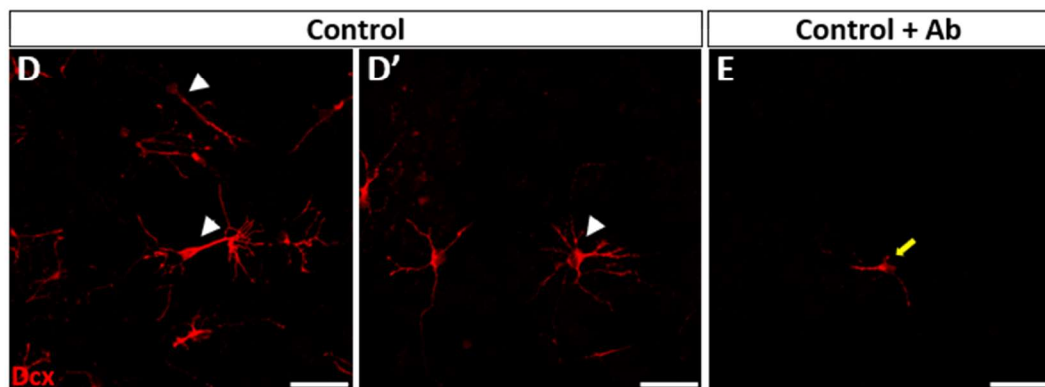

Supplementary Figure S2. Analysis of the effects of laminin and of integrin- $\beta$ 1 blocking on neurogenesis and oligodendrogenesis. (A) Graph showing the presence of Olig2+ cells (either Olig2+ only, or double Olig2+ and PCNA+) and of non-Olig2+ cells around random Olig2+ cells. Data are shown as percentages. Note the statistically significant increase in the presence of Olig2+ cells when

comparing the “control” versus “control + Ab” and “laminin” versus “laminin + Ab” groups. (\* $p < 0.05$ , using t-test analysis,  $n = 3$ ; error bars: SEM). (B and C) Graphs showing the number (in B) and total length of processes (in C) in all experimental conditions ( $p > 0.05$ , Statistical analysis was performed by repeated measures ANOVA,  $n = 2-3$ ). (D, D' and E) Representative images which show characteristic morphologies of Dcx+ cells in control conditions or after the addition of  $\beta 1$ -blocking antibody. The arrowheads and the arrow indicate Dcx+ cell bodies, respectively. [scale bar: 30 $\mu$ m]
